# Supplementary material
Source: publisher site journal article supplement (https://www.dovepress.com/article/150952)
Supplement: Supplementary file 1 [file get_supplementary_file.php]

Supplementary materials

Table S1

| Study                           | Journal                   | Cancer Type             | Axl/Gas6 expression (cancer vs normal)                                                  | Detection method and reagent                          | Cut-off                                                                                                                                                                                                                                                                                                                                                                                                                                       |
|---------------------------------|---------------------------|-------------------------|-----------------------------------------------------------------------------------------|-------------------------------------------------------|-----------------------------------------------------------------------------------------------------------------------------------------------------------------------------------------------------------------------------------------------------------------------------------------------------------------------------------------------------------------------------------------------------------------------------------------------|
| <b>Cormack</b> <sup>13</sup>    | British Journal of Cancer | Breast cancer           | Gas6: 87.8% (43/49) in cancer                                                           | QPCR, relative standard curve and internal control    | Medians of 2- $\Delta\Delta$ CT methods                                                                                                                                                                                                                                                                                                                                                                                                       |
| <b>Hutterer</b> <sup>14</sup>   | Clin Cancer Res           | Glioblastoma multiforme | Axl<br>Cancer: 59.2% (45/76)<br>Gas6<br>Cancer: 72.4% (55/76)<br>Normal: Not detectable | IHC, anti-Axl ( Max Planck Institute of Biochemistry) | GIS: Percentage of positive cells was graded as 0 (negative), 1 (up to 10%), 2(11-50%), 3 (51-80%), or 4 (>80% positive cells) and staining intensity as 0 (no staining), 1 (weak), 2(moderate), or 3 (strong). The final immunoreactive GIS was defined as the multiplication of both grading results .Protein expression frequencies were analyzed by dividing the GIS into no/low (GIS < 5), moderate (GIS 5-8), and high (GIS > 8) levels |
| <b>Gustafsson</b> <sup>15</sup> | Clin Cancer Res           | Renal cell carcinoma    | Axl and Gas6: NR                                                                        | QPCR, relative standard curve and internal control    | mRNA: Axl mRNA (n =221) levels were divided into low (<25th                                                                                                                                                                                                                                                                                                                                                                                   |
| <b>Gjerdrum</b> <sup>16</sup>   | PNAS                      | Breast cancer           | Axl: NR                                                                                 | IHC, anti-Axl (Santa                                  | SI: Intensity (0: no staining to                                                                                                                                                                                                                                                                                                                                                                                                              |

|                             |                                |                                  |                                                     |                            |                                                                                                                                                                                                       |
|-----------------------------|--------------------------------|----------------------------------|-----------------------------------------------------|----------------------------|-------------------------------------------------------------------------------------------------------------------------------------------------------------------------------------------------------|
|                             |                                |                                  |                                                     | Cruz, H-124)               | 3: strong staining) multiply by percentage (0: no tumor cells positive; 1:<10% positive; 2:10%–50% positive; 3:>50% positive). Cut-off value: median value)                                           |
| <b>Hector</b> <sup>17</sup> | Cancer biology & Therapy       | Esophageal adenocarcinoma        | Axl<br>Cancer: 60.9%(56/92)<br>Normal: 5.8% (3/92)  | TMA, anti-Axl (AF154; R&D) | SI: Intensity (0: no staining to 2: intense staining) multiply by percentage (0: no tumor cells positive; 1:<25% positive; 2:25%–50% positive; 3:>51-75% positive; 4>75% positive). Cut-off value: 3. |
| <b>Song</b> <sup>18</sup>   | Cancer                         | pancreatic ductal adenocarcinoma | Axl<br>Cancer: 70%(38/54)<br>Normal: 22%(11/50)     | IHC, anti-Axl (Abcam)      | 25th percentile of Axl labeling score: Axl high (Axl labeling score >7.56), and Axl low (Axl labeling score<7.56).                                                                                    |
| <b>Lee</b> <sup>19</sup>    | Ann Surg Oncol                 | Oral squamous cell carcinoma     | Axl<br>Cancer: 54.5%(61/112)<br>Normal: 10.9%(5/46) | IHC, anti-Axl (Santa Cruz) | Positive (>25%) and negative (<25%) according to the percentage of positive staining cells.                                                                                                           |
| <b>Chen</b> <sup>20</sup>   | Annals of Diagnostic Pathology | Ovarian carcinoma                | Axl<br>Cancer: 61.3%(49/80)<br>Normal: 0(0/10)      | IHC, anti-Axl (Santa Cruz) | Positive ( $\geq 10\%$ ) and negative ( $\leq 10\%$ ) according to the percentage of positive staining cells.                                                                                         |
| <b>Han</b> <sup>21</sup>    | Biochemical and                | Osteosarcoma                     | Axl                                                 | IHC, anti-Axl              | SI: Intensity (0: no staining to                                                                                                                                                                      |

|                               |                                           |                                |                                                                       |                                                                      |                                                                                                                                                                                                       |
|-------------------------------|-------------------------------------------|--------------------------------|-----------------------------------------------------------------------|----------------------------------------------------------------------|-------------------------------------------------------------------------------------------------------------------------------------------------------------------------------------------------------|
|                               | Biophysical<br>Research<br>Communications |                                | Cancer: 43.5%(27/62)<br>Normal: 14.3%(3/21)                           | (R&D)                                                                | 3: intense staining) multiply by percentage (0: no tumor cells positive; 1:<25% positive; 2:25%–50% positive; 3:>51-75% positive; 4>75% positive). Cut-off value: 2.                                  |
| <b>Ishikawa</b> <sup>22</sup> | Ann Surg Oncol                            | Lung cancer                    | Axl<br>Cancer: 32.9%(29/88)<br>Gas6: 25%(22/88)<br>Normal: NR         | IHC, anti-Axl (Santa Cruz, sc-20741)                                 | SI: Intensity (0: no staining to 3: intense staining) multiply by percentage (0: no tumor cells positive; 1:≤10% positive; 2:11%–50% positive; 3:>51-80% positive; 4>80% positive). Cut-off value: 7. |
| <b>Kawano</b> <sup>23</sup>   | Carcinogenesis                            | Colorectal cancer              | Gas6<br>Cancer: 46.8%(29/62)<br>Normal: N/A                           | IHC, anti-Gas6 (Santa Cruz)                                          | “high” ≥50% of the tumor cells stained with anti-Gas6 antibody; “low” : <50% of the tumor cells were stained.                                                                                         |
| <b>Pinato</b> <sup>24</sup>   | British Journal of Surgery                | Malignant pleural mesothelioma | Axl<br>Cancer: 74%(47/63)<br>Gas6<br>Cancer: 47%(30/63)<br>Normal: NR | IHC<br>anti-Axl ( Sigma, HPA037422)<br>anti-Gas6 ( Sigma, HPA008275) | HS (histoscore): percentage of tumour cells staining positively (range 0-100) multiplied by staining intensity graded as negative, weak, moderate or strong (range 0-3) (total: 0-300). Cut-          |

|                              |                             |                            |                                                       |                                      |                                                                                                                                                                                                                                                                                                                                              |
|------------------------------|-----------------------------|----------------------------|-------------------------------------------------------|--------------------------------------|----------------------------------------------------------------------------------------------------------------------------------------------------------------------------------------------------------------------------------------------------------------------------------------------------------------------------------------------|
| <b>Dunne</b> <sup>25</sup>   | Clin Cancer Res             | Colorectal cancer          | Axl<br>Cancer:<br>64.6%(329/509)<br>Normal: NR        | IHC<br>anti-Axl ( Sigma)             | off: Axl: 150; Gas6: 0)<br>SI: Intensity (0: no staining to<br>3: strong staining), grade 0-1:<br>low expression, and grade 2-3:<br>high expression.                                                                                                                                                                                         |
| <b>Fleuren</b> <sup>26</sup> | Oncotarget                  | Ewing Sarcoma              | Axl<br>Cancer: 53%(8/15)<br>Normal: NR                | IHC<br>anti-Axl ( cell<br>signaling) | SI: Intensity (0: no staining to<br>3: strong staining), grade 0-2:<br>low expression, and grade 3<br>(>10% positive cells): high<br>expression.                                                                                                                                                                                             |
| <b>Brand</b> <sup>27</sup>   | Clinical Cancer<br>Research | Head and Neck<br>Cancer    | Axl<br>Cancer: 38%(24/63)<br>Normal: 0%(0/6)          | TMA<br>anti-Axl ( R&D)               | SI: Intensity (0: no staining to<br>3: strong staining), grade 0-1:<br>low expression, and grade 2-3:<br>high expression.                                                                                                                                                                                                                    |
| <b>Hsieh</b> <sup>28</sup>   | Oncotarget                  | Esophageal<br>cancer       | Axl<br>Cancer:<br>93/116(80.3%)<br>Normal: 5/89(5.6%) | IHC<br>anti-Axl (Abcam,<br>Ab72069 ) | Score 0: no reactivity in any<br>tumor cell; Score 1+: tumor<br>cells cluster with a faint<br>reactivity irrespective of tumor<br>cells stained; Score 2+: tumor<br>cells cluster with a moderate<br>eactivity irrespective of tumor<br>cells stained; Score 3+: tumor<br>cells cluster with a diffuse and<br>strong reactivity. cut-off:>=1 |
| <b>Jiang</b> <sup>29</sup>   | Adv Clin Exp Med            | nasopharygeal<br>carcinoma | Axl<br>Cancer:                                        | IHC<br>anti-Axl ( R&D)               | Staining percentage: >=10<br>(positive)                                                                                                                                                                                                                                                                                                      |

|                              |                  |                                            |                                                                    |                                                                     |                                                                                                                                                                                                          |
|------------------------------|------------------|--------------------------------------------|--------------------------------------------------------------------|---------------------------------------------------------------------|----------------------------------------------------------------------------------------------------------------------------------------------------------------------------------------------------------|
|                              |                  |                                            | 68.8% (59/86)<br>Normal:<br>20% (4/20)                             |                                                                     |                                                                                                                                                                                                          |
| <b>Qu</b> <sup>30</sup>      | Oncology Letters | Lung cancer                                | Axl<br>Cancer:<br>54.5%(73/134)<br>Normal:<br>29.1%(39/134)        | TMA<br>anti-Axl (Abcam,<br>Ab72069)                                 | SI: Intensity (0: no staining to<br>3: intense staining) multiply by<br>percentage (1:<30% positive;<br>2:30%–60% positive; 3:>60%<br>positive.). Cut-off value: 3.                                      |
| <b>Reichl</b> <sup>31</sup>  | Hepatology       | Hepatic cancer                             | Axl: NR                                                            | TMA<br>anti-Axl ( cell<br>signaling)                                | NR                                                                                                                                                                                                       |
| <b>Hattori</b> <sup>32</sup> | Ann Surg Oncol   | Urothelial<br>Carcinoma                    | Cancer: Axl:58.4%<br>(94/161)<br>Gas6:55.3% (89/161)<br>Normal: NR | IHC<br>anti-Axl (Santa<br>cruz, H-124)<br>anti-Gas6 (R&D,<br>AF885) | SI: Intensity (0: no staining to<br>3: intense staining) multiply by<br>percentage (0:negative,<br>1:<10% positive; 2:11%–50%<br>positive; 3:51-80% positive;<br>4:>80% positive.). Cut-off<br>value: 6. |
| <b>Liu</b> <sup>33</sup>     | Plos One         | Hepatic cancer                             | Axl<br>Cancer: 54/246(22%)<br>Normal: Not<br>detectable            | TMA<br>anti-Axl (R&D)                                               | “high” ≥50% of the tumor<br>cells stained with anti-Axl<br>antibody; “low” : <50% of the<br>tumor cells were stained.                                                                                    |
| <b>Roland</b> <sup>34</sup>  | Ann Surg Oncol   | Undifferentiated<br>Pleomorphic<br>Sarcoma | Axl<br>Cancer: NR<br>Normal: NR                                    | IHC<br>anti-Axl (cell<br>signaling)                                 | Percentage was recorded, and<br>an intensity score was<br>assigned: 0 = no expression; 1<br>= low expression;                                                                                            |

|                             |                        |               |                                                     |                                      |                                                                                                                                                                                               |
|-----------------------------|------------------------|---------------|-----------------------------------------------------|--------------------------------------|-----------------------------------------------------------------------------------------------------------------------------------------------------------------------------------------------|
|                             |                        |               |                                                     |                                      | 2 = intermediate expression; 3 = high expression. >10 % of cells were stained is considered positive.                                                                                         |
| <b>Tanaka</b> <sup>35</sup> | Clinical Breast Cancer | Breast cancer | Axl<br>Cancer: 49.6%(170/343)<br>Normal: NR         | IHC<br>anti-Axl ( Santa Cruz, H-124) | Percentage of cytoplasmic staining area was recorded as 0% to 100%. Axl staining >60% cells was considered Axl-high expression                                                                |
| <b>Wang</b> <sup>36</sup>   | Theranostics           | Breast cancer | Axl<br>Cancer: 21/50(42%)<br>Normal: NR             | IHC<br>anti-Axl (cell signaling)     | NR                                                                                                                                                                                            |
| <b>Jin</b> <sup>37</sup>    | Oncology Letters       | Breast cancer | Axl<br>Cancer: 34/60(56.6%)<br>Normal: 13/40(32.5%) | IHC<br>anti-Axl ( Abcam, Ab37861)    | SI: Intensity (0: no staining to 4: extremely staining) multiply by percentage (0:≤10% positive; 1:11-25% positive; 2:26%–50% positive; 3:51-75% positive; 4>75% positive). Cut-off value: 4. |

**Table S2**

|           | Item | Sum | Quality |
|-----------|------|------|------|------|------|------|------|------|------|------|------|------|------|------|------|------|------|------|------|------|------|-----|---------|
|           | 1    | 2    | 3    | 4    | 5    | 6    | 7    | 8    | 9    | 10   | 11   | 12   | 13   | 14   | 15   | 16   | 17   | 18   | 19   | 20   |      |     | Score%  |
| <b>1</b>  | 2    | 2    | 1    | 2    | 2    | 1    | 0    | 1    | 0    | 1    | 2    | 2    | 2    | 2    | 1    | 2    | 1    | 2    | 1    | 1    | 28   | 70% |         |
| <b>2</b>  | 2    | 2    | 2    | 2    | 2    | 1    | 2    | 1    | 1    | 2    | 2    | 2    | 2    | 2    | 1    | 2    | 1    | 2    | 0    | 2    | 33   | 83% |         |
| <b>3</b>  | 2    | 2    | 2    | 0    | 2    | 1    | 0    | 0    | 1    | 2    | 2    | 2    | 2    | 0    | 2    | 2    | 1    | 2    | 0    | 2    | 27   | 68% |         |
| <b>4</b>  | 2    | 2    | 2    | 1    | 2    | 2    | 2    | 0    | 0    | 2    | 2    | 2    | 2    | 0    | 1    | 2    | 1    | 2    | 0    | 2    | 29   | 73% |         |
| <b>5</b>  | 2    | 2    | 2    | 2    | 2    | 2    | 2    | 1    | 0    | 2    | 0    | 2    | 2    | 2    | 2    | 2    | 1    | 2    | 1    | 1    | 32   | 80% |         |
| <b>6</b>  | 2    | 2    | 2    | 2    | 2    | 1    | 2    | 1    | 0    | 2    | 0    | 2    | 2    | 2    | 2    | 2    | 0    | 2    | 1    | 2    | 31   | 78% |         |
| <b>7</b>  | 2    | 2    | 1    | 2    | 2    | 1    | 1    | 1    | 0    | 2    | 0    | 2    | 2    | 2    | 2    | 2    | 0    | 2    | 0    | 2    | 28   | 70% |         |
| <b>8</b>  | 2    | 2    | 2    | 2    | 2    | 1    | 1    | 1    | 0    | 2    | 0    | 2    | 2    | 2    | 2    | 2    | 0    | 2    | 1    | 2    | 30   | 75% |         |
| <b>9</b>  | 2    | 2    | 0    | 2    | 2    | 1    | 1    | 1    | 1    | 2    | 2    | 2    | 2    | 2    | 1    | 2    | 0    | 2    | 1    | 2    | 30   | 75% |         |
| <b>10</b> | 2    | 2    | 1    | 2    | 2    | 2    | 2    | 0    | 1    | 2    | 0    | 2    | 2    | 2    | 2    | 2    | 0    | 2    | 2    | 2    | 32   | 80% |         |
| <b>11</b> | 2    | 1    | 0    | 2    | 2    | 1    | 2    | 1    | 0    | 2    | 0    | 2    | 2    | 2    | 1    | 1    | 0    | 2    | 1    | 2    | 26   | 65% |         |
| <b>12</b> | 2    | 2    | 2    | 2    | 2    | 2    | 1    | 1    | 0    | 2    | 0    | 2    | 2    | 2    | 2    | 2    | 0    | 2    | 1    | 2    | 31   | 78% |         |
| <b>13</b> | 2    | 2    | 0    | 2    | 2    | 1    | 2    | 0    | 0    | 2    | 0    | 2    | 2    | 2    | 2    | 2    | 1    | 2    | 0    | 1    | 27   | 68% |         |
| <b>14</b> | 2    | 1    | 1    | 2    | 2    | 1    | 1    | 0    | 1    | 1    | 2    | 2    | 2    | 2    | 2    | 2    | 1    | 2    | 2    | 1    | 30   | 75% |         |
| <b>15</b> | 2    | 1    | 2    | 2    | 2    | 1    | 1    | 1    | 1    | 2    | 0    | 2    | 2    | 2    | 2    | 2    | 0    | 2    | 1    | 1    | 29   | 73% |         |
| <b>16</b> | 2    | 1    | 1    | 2    | 2    | 2    | 2    | 1    | 1    | 2    | 0    | 2    | 2    | 2    | 2    | 2    | 0    | 2    | 1    | 2    | 31   | 78% |         |
| <b>17</b> | 2    | 2    | 1    | 2    | 1    | 1    | 1    | 1    | 1    | 2    | 0    | 2    | 2    | 2    | 2    | 2    | 1    | 2    | 0    | 2    | 29   | 73% |         |
| <b>18</b> | 2    | 2    | 0    | 2    | 2    | 2    | 2    | 1    | 0    | 2    | 0    | 2    | 2    | 2    | 2    | 2    | 1    | 2    | 0    | 1    | 29   | 73% |         |
| <b>19</b> | 2    | 2    | 1    | 0    | 0    | 1    | 0    | 0    | 0    | 2    | 0    | 2    | 2    | 0    | 2    | 2    | 1    | 2    | 0    | 2    | 21   | 53% |         |
| <b>20</b> | 2    | 2    | 2    | 2    | 2    | 2    | 2    | 1    | 0    | 2    | 2    | 2    | 2    | 2    | 2    | 2    | 0    | 2    | 2    | 1    | 34   | 85% |         |
| <b>21</b> | 2    | 2    | 2    | 2    | 2    | 1    | 1    | 1    | 0    | 2    | 0    | 2    | 2    | 2    | 2    | 2    | 1    | 2    | 2    | 2    | 32   | 80% |         |
| <b>22</b> | 2    | 2    | 2    | 0    | 2    | 1    | 2    | 0    | 0    | 2    | 2    | 2    | 2    | 0    | 2    | 1    | 0    | 2    | 2    | 2    | 28   | 70% |         |
| <b>23</b> | 2    | 2    | 2    | 2    | 2    | 2    | 1    | 1    | 0    | 2    | 2    | 2    | 2    | 2    | 2    | 1    | 0    | 2    | 1    | 2    | 32   | 80% |         |
| <b>24</b> | 2    | 2    | 2    | 2    | 0    | 1    | 0    | 1    | 0    | 2    | 2    | 2    | 1    | 2    | 1    | 1    | 0    | 2    | 1    | 2    | 26   | 65% |         |

---

|           |   |   |   |   |   |   |   |   |   |   |   |   |   |   |   |   |   |   |   |   |   |    |     |
|-----------|---|---|---|---|---|---|---|---|---|---|---|---|---|---|---|---|---|---|---|---|---|----|-----|
| <b>25</b> | 2 | 2 | 2 | 2 | 2 | 2 | 2 | 2 | 1 | 0 | 2 | 2 | 2 | 2 | 2 | 1 | 1 | 0 | 2 | 0 | 2 | 31 | 78% |
|-----------|---|---|---|---|---|---|---|---|---|---|---|---|---|---|---|---|---|---|---|---|---|----|-----|

---



| Study or Subgroup | log[Hazard Ratio] | SE    | Weight | Hazard Ratio       |              |
|-------------------|-------------------|-------|--------|--------------------|--------------|
|                   |                   |       |        | IV, Random, 95% CI |              |
| 2008 Cormack      | -1.022            | 0.677 | 6.1%   | 0.36               | [0.10, 1.36] |
| 2008 Hutterer     | 0.779             | 0.566 | 8.4%   | 2.18               | [0.72, 6.61] |
| 2009 Gustafsson   | 0.23              | 0.198 | 35.4%  | 1.26               | [0.85, 1.86] |
| 2013 Ishikawa     | 0.732             | 0.53  | 9.4%   | 2.08               | [0.74, 5.88] |
| 2013 Pinato       | 0.358             | 0.285 | 23.9%  | 1.43               | [0.82, 2.50] |
| 2016 Hattori      | 0.765             | 0.371 | 16.7%  | 2.15               | [1.04, 4.45] |

**Total (95% CI)** 100.0% **1.44 [1.02, 2.04]**

Heterogeneity:  $\tau^2 = 0.05$ ;  $\chi^2 = 6.82$ ,  $df = 5$  ( $P = 0.23$ );  $I^2 = 27\%$

Test for overall effect:  $Z = 2.08$  ( $P = 0.04$ )

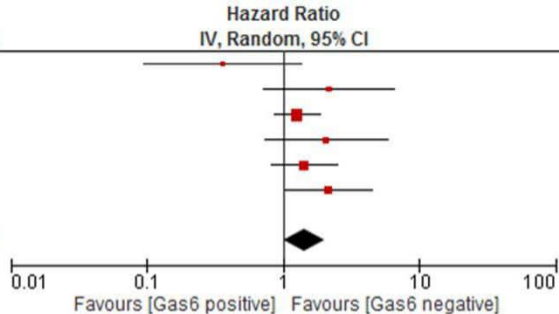

## Supplemental Figure 1.

Forest plot of the hazard ratio (HR) for overall survival (OS) associated with Gas6 expression with 1 study deleted in all solid tumor patients.
